# Supplementary material for: Solution Combustion Synthesis of Hafnium-Doped Indium Oxide Thin Films for Transparent Conductors
Source: MDPI journal article supplement (doi:10.3390/nano12132167), 2022-06-23
Supplement: s1 [file s1]

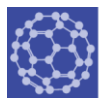

## Supplementary Material

# Solution Combustion Synthesis of Hafnium-Doped Indium Oxide Thin Films for Transparent Conductors

Rita Firmino, Emanuel Carlos \*, Joana Vaz Pinto, Jonas Deuermeier, Rodrigo Martins, Elvira Fortunato, Pedro Barquinha \* and Rita Branquinho \*

CENIMAT|i3N, Department of Materials Science and CEMOP/UNINOVA, NOVA School of Science and Technology, NOVA University of Lisbon, 2829-516 Caparica, Portugal; r.firmino@campus.fct.unl.pt (R.F.); jdvdp@fct.unl.pt (J.V.P.); j.deuermeier@fct.unl.pt (J.D.); rfpm@fct.unl.pt (R.M.); emf@fct.unl.pt (E.F.)

\* Correspondence: e.carlos@fct.unl.pt (E.C.); pmcb@fct.unl.pt (P.B.); ritasba@fct.unl.pt (R.B.)

The supplementary material contains relevant data related to the characterization of dopant quantity and post-deposition treatments of  $\text{In}_2\text{O}_3$  thin films developed in this work. Figure S1 and Table S1 display the FTIR spectra of solutions and doped thin films. Figure S2 shows SEM images of thin films with different annealing conditions and doping. XPS analysis is presented on Figure S3 and S4, and Table S2 and S3. For the different annealing condition study thickness (Table S4), transmittance (Figure S5), XRD diffractogram (Figure S6), AFM images (Figure S7) and atomic ratio (Figure S8) are also presented. Table S5 shows the results electrical properties of Hf-doped thin films prepared by various methods.

## FTIR Analysis of Precursor Solutions and Hf-Doped $\text{In}_2\text{O}_3$ Thin Films

Figure S1 depicts the FT-IR spectra of undoped and 0.5 M % Hf-doped indium oxide solutions and thin films for each molar ratio studied. Most of the vibration bands in precursor solutions

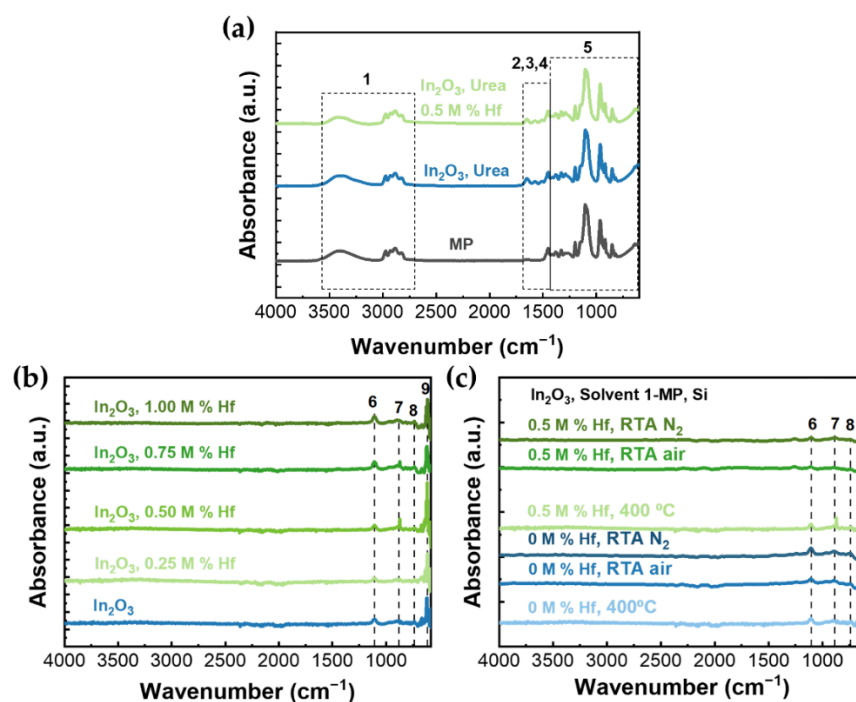

**Figure S1.** FTIR spectra of (a)  $\text{In}_2\text{O}_3$  solutions with urea, and combustion doped 0.5 M % of Hf; (b) indium oxide thin films doped with different hafnium quantities, annealed at 400 °C in air; (c) undoped and 0.5 M % Hf-doped indium oxide thin films, annealed at 400 °C in air.

Figure S1a are expected for 1-methoxy-2-propanol, that's the case of the ranges numbered as 1 ( $3500\text{--}2800\text{ cm}^{-1}$ ) and 5 ( $1450\text{--}850\text{ cm}^{-1}$ ). Although the peak at  $1110\text{ cm}^{-1}$  could be also attributed to Si-O bond, from the substrate. Peaks labeled as 2 ( $1650\text{ cm}^{-1}$ ) and 3 ( $1575\text{ cm}^{-1}$ ) are attributed to C-O and N-H vibrations from urea.[1] The peak 4 present at  $1510\text{ cm}^{-1}$  can be correlated with N-O vibrations, originated from the indium precursor.

**Table S1.** Characteristic absorbance peaks and associated vibrational modes of the corresponding chemical bonds for the spectrum of indium oxide thin films on silicon.

| Number | Position ( $\text{cm}^{-1}$ ) | Mode Type                     | Chemical Bond |
|--------|-------------------------------|-------------------------------|---------------|
| 6      | 1110                          | Transverse Optical Stretching | Si-O          |
| 7      | 896                           | Bending                       | In-O          |
| 8      | 736                           | Stretching                    | In-O          |
| 9      | 613                           | Bending                       | In-O          |

As reflected in Figure S1b and S1c, after correction of the atmosphere contribution, all samples seem to have similar behaviors, meaning that the different dopant quantities did not prevent the reaction to fully occur. It is possible to confirm that the reaction occurred to its full extent as none of the organic absorbance peaks presented in the solution spectra are visible, Figure S1b and S1c. The absorbance peaks that appear between  $890$  and  $610\text{ cm}^{-1}$  are characteristic of vibrational modes of indium, as shown in Table S1.[2]

### SEM Images

Surface morphology analysis was performed by SEM, and the results are shown in Figure S2. All annealing conditions presented a granular, uniform, and crack-free surface.

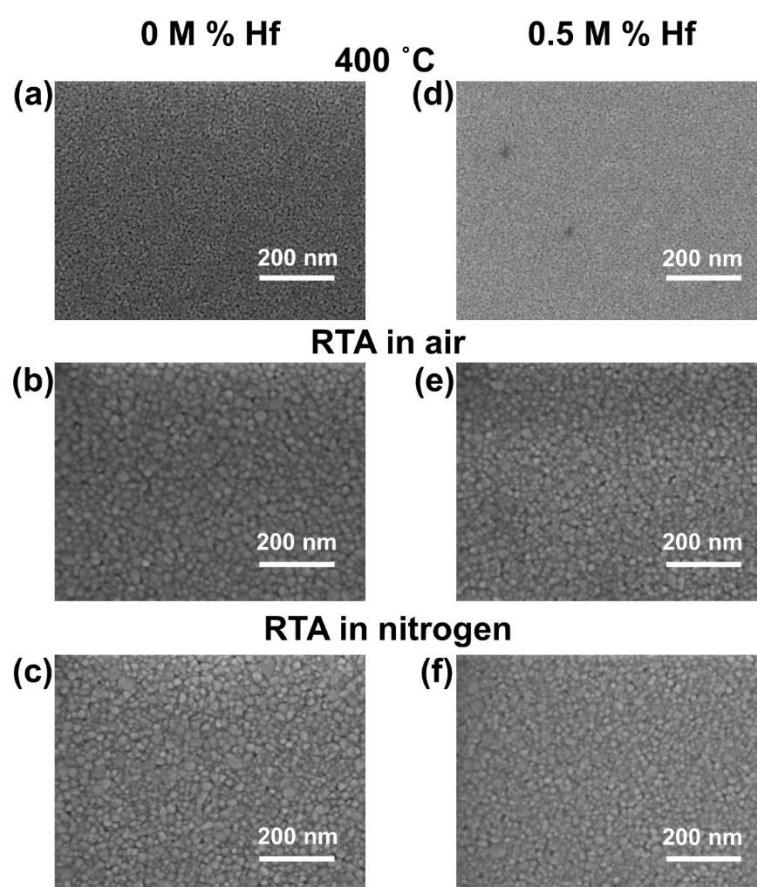

**Figure S2.** SEM surface images of (a–c) undoped and (d–f) Hf-doped  $\text{In}_2\text{O}_3$  thin films annealed at (a,d)  $400\text{ }^\circ\text{C}$  (ambient conditions), (b,e) RTA in air and (c,f) RTA in nitrogen at  $600\text{ }^\circ\text{C}$ .

### XPS Analysis

XPS spectra of undoped and Hf-doped  $\text{In}_2\text{O}_3$ , at different dopant concentrations and annealing conditions are presented on Figure S3 and S4.

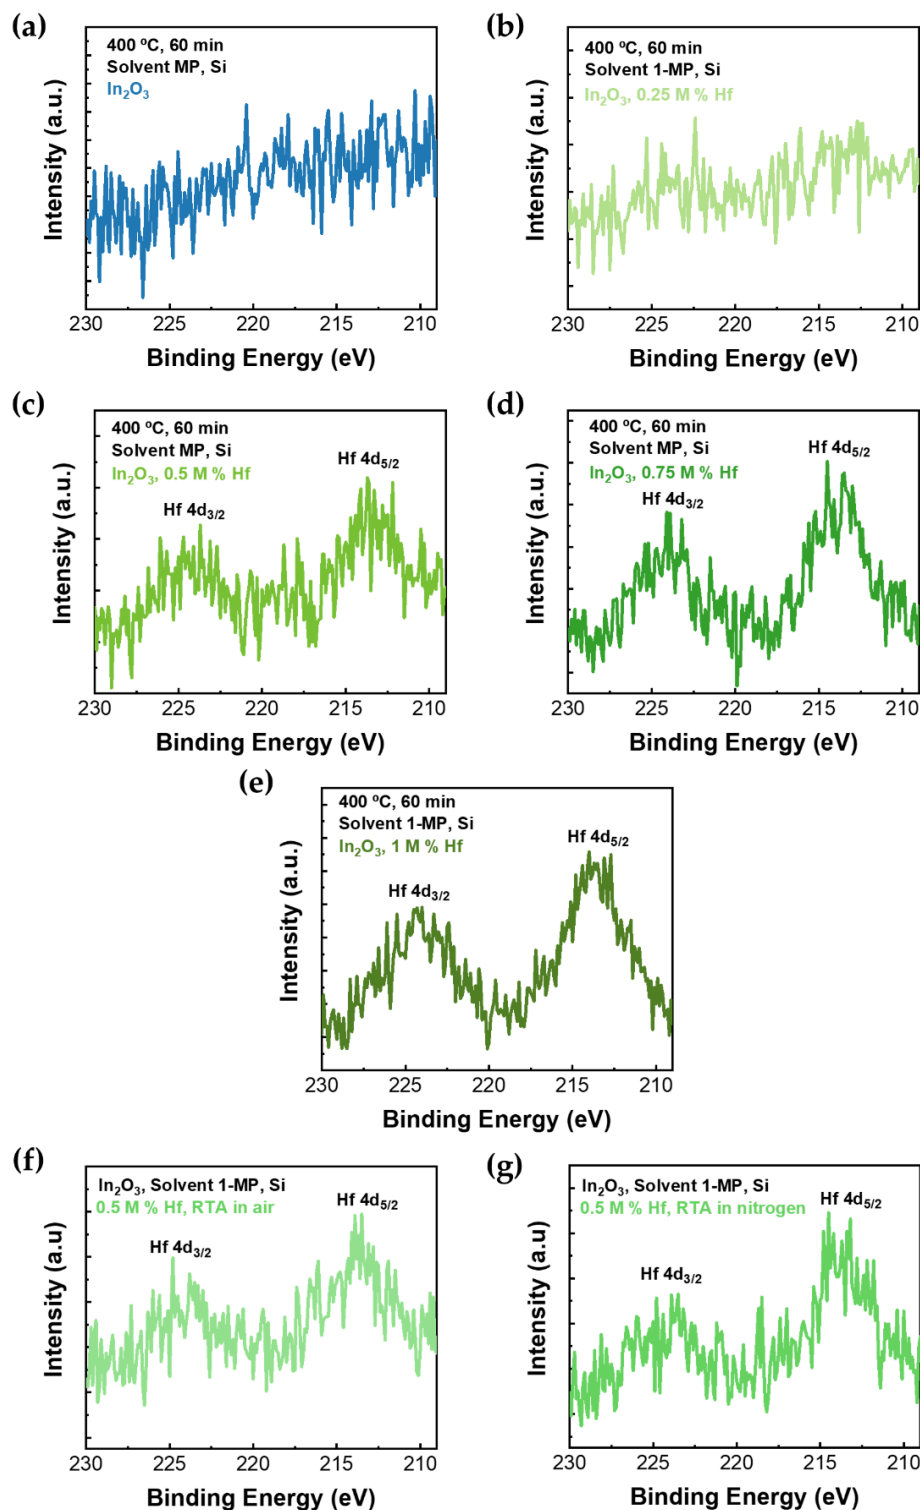

**Figure S3.** Hf 4d core-level spectra of  $\text{In}_2\text{O}_3$  thin films (a) undoped and doped with (b) 0.25 M % Hf, (c) 0.5 M % Hf, (d) 0.75 M % Hf and (e) 1 M % Hf annealed at 400 °C in air. Hf 4d core-level spectra of 0.5 M % Hf doped  $\text{In}_2\text{O}_3$  thin films annealed in RTA in (f) air and (g) nitrogen at 600 °C for 10 min.

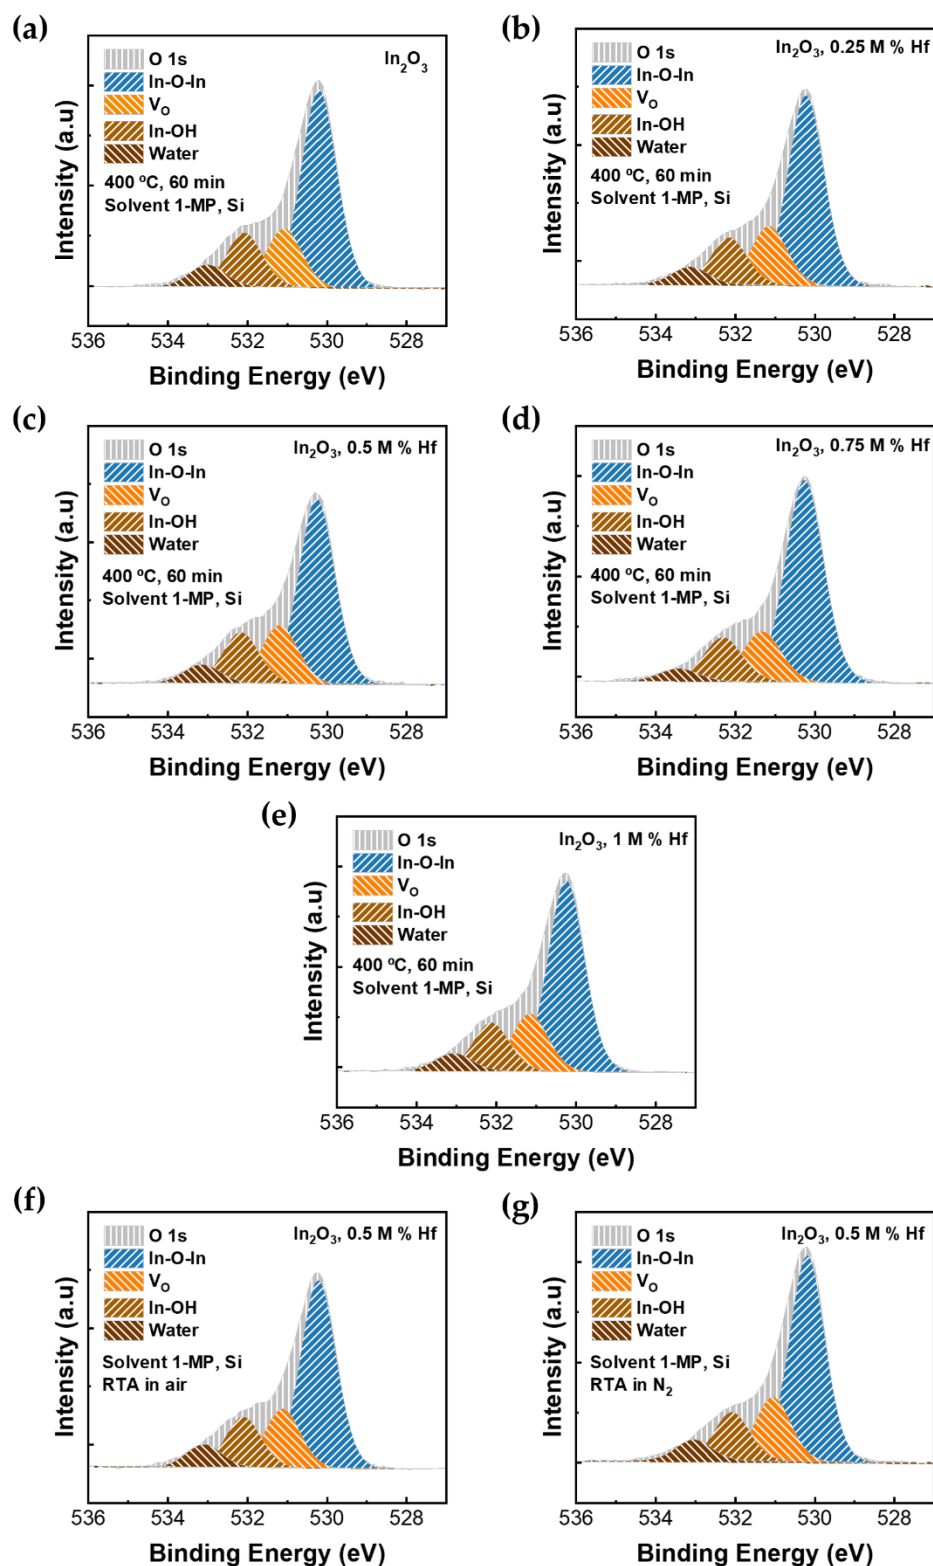

**Figure S4.** O 1s core-level spectra of  $\text{In}_2\text{O}_3$  thin films (a) undoped and doped with (b) 0.25 M % Hf, (c) 0.5 M % Hf, (d) 0.75 M % Hf and (e) 1 M % Hf annealed at 400 °C in air. O 1s core-level spectra of 0.5 M % Hf doped  $\text{In}_2\text{O}_3$  thin films annealed in RTA in (f) air and (g) nitrogen at 600 °C for 10 min.

**Table S2.** Peak area, in %, of each peak present in core-level O 1s peak for each M % of Hf doping in In<sub>2</sub>O<sub>3</sub> thin films.

| M % Hf | Area (%) |                |       |                  |
|--------|----------|----------------|-------|------------------|
|        | In-O-In  | V <sub>o</sub> | In-OH | H <sub>2</sub> O |
| 0      | 59.44    | 17.66          | 16.29 | 6.61             |
| 0.25   | 60.56    | 18.76          | 15.05 | 5.63             |
| 0.5    | 59.02    | 18.65          | 16.29 | 6.04             |
| 0.75   | 65.26    | 16.25          | 14.28 | 4.72             |
| 1      | 60.66    | 18.23          | 15.39 | 5.72             |

**Table S3.** Area, in %, of each of the peaks present in core-level O 1s peak for 0.5 M % Hf doped-In<sub>2</sub>O<sub>3</sub> thin films annealed in different conditions.

| Annealing             | Area (%) |                |       |                  |
|-----------------------|----------|----------------|-------|------------------|
|                       | In-O-In  | V <sub>o</sub> | In-OH | H <sub>2</sub> O |
| 400 °C                | 59.02    | 18.65          | 16.29 | 6.04             |
| RTA in air            | 58.48    | 18.38          | 15.88 | 7.26             |
| RTA in N <sub>2</sub> | 60.61    | 18.82          | 14.35 | 6.22             |

### Characterization of Films with Different Annealing Conditions

**Table S4.** Thickness of undoped and Hf-doped In<sub>2</sub>O<sub>3</sub> thin films with different annealing conditions.

| Dopant     | Annealing          |                |                       |
|------------|--------------------|----------------|-----------------------|
|            | 400 °C on Hotplate | RTA in Air     | RTA in N <sub>2</sub> |
| -          | 104.0 ± 0.6 nm     | 79.12 ± 0.4 nm | 79.34 ± 0.4 nm        |
| 0.5 M % Hf | 110.9 ± 1.3 nm     | 92.22 ± 0.5 nm | 92.09 ± 0.3 nm        |

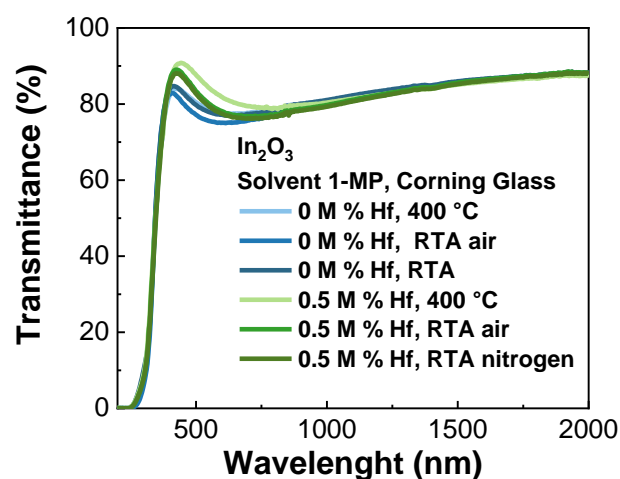**Figure S5.** Transmittance spectra of undoped and 0.5 M % Hf- doped In<sub>2</sub>O<sub>3</sub> thin films.

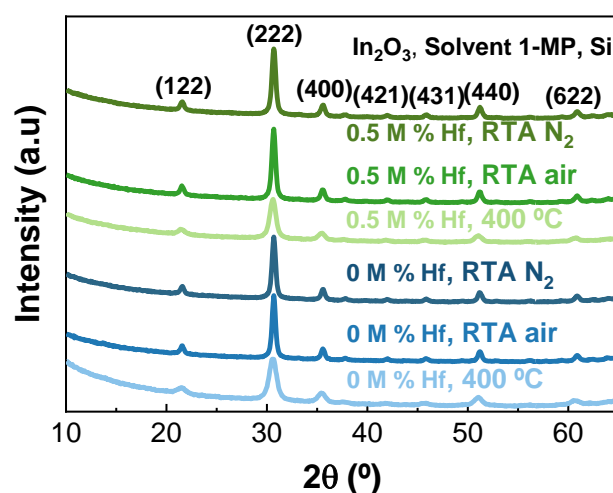

**Figure S6.** XRD diffractograms of undoped and Hf-doped  $\text{In}_2\text{O}_3$  thin films, with different post-deposition treatments.

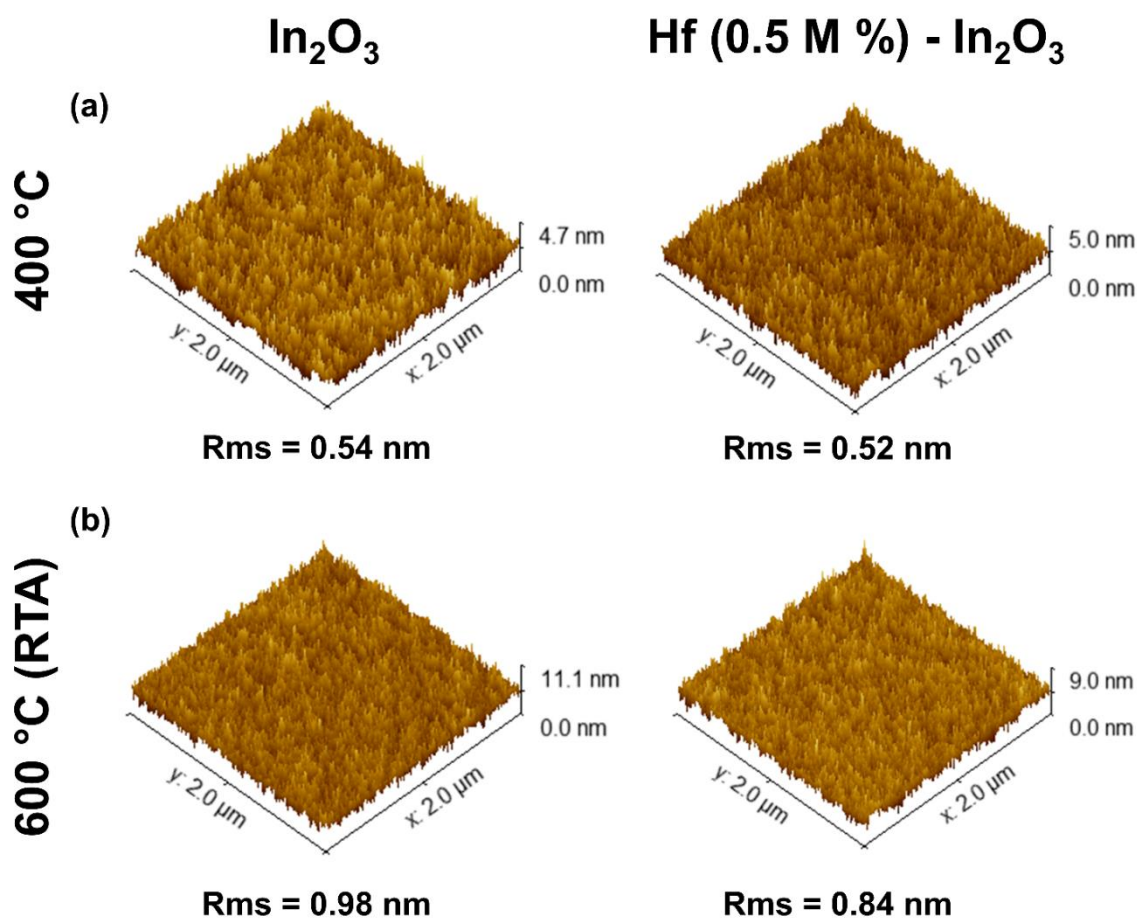

**Figure S7.** AFM images ( $2 \times 2 \mu\text{m}^2$ ) of the undoped and doped indium oxide thin films in air (a) in a hotplate at 400 °C and (b) in RTA at 600 °C.



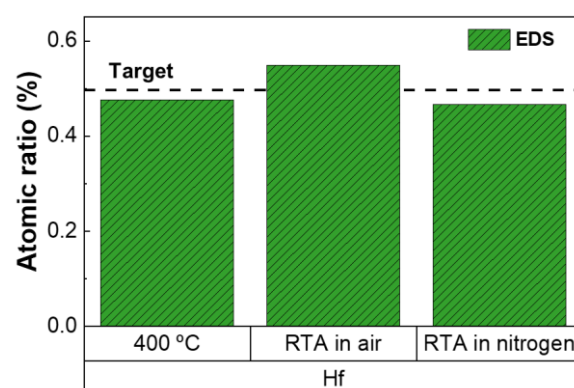

Figure S8. Atomic ratio (%) of 0.5 M % Hf-doped  $\text{In}_2\text{O}_3$  thin films obtained throughout EDS.

### Hafnium Doped TCOs

Table S5. Electrical properties of Hf-doped transparent conductive thin films prepared by various methods.

| Year             | TCO                                    | Process          | $T_{550\text{ nm}}$ (%) | $\rho$ ( $\Omega\cdot\text{cm}$ ) | N ( $\times 10^{20}\text{cm}^{-3}$ ) | $\mu$ ( $\text{cm}^2/\text{V s}$ ) |
|------------------|----------------------------------------|------------------|-------------------------|-----------------------------------|--------------------------------------|------------------------------------|
| 2012 [3]         | Hf (3.3 at.%) - ZnO                    | ALD <sup>1</sup> | 80                      | $6.0 \times 10^{-4}$              | 3.7                                  | 20.0                               |
| 2013 [4]         | Hf (4.6 at.%) - ZnO                    | ALD <sup>1</sup> | -                       | $1.6 \times 10^{-3}$              | 3.5                                  | 12.5                               |
| 2015 [5]         | Hf (3 at %) - ZnO                      | Dip-coating      | 75                      | $5.6 \times 10^{-3}$              | 0.5                                  | 2.5                                |
| 2017 [6]         | Hf (2.8 wt%) - $\text{In}_2\text{O}_3$ | RF Sputtering    | 82                      | $3.8 \times 10^{-4}$              | 4.1                                  | 50.7                               |
| 2019 [7]         | 1:1 Hf:ZnO cycle ratio                 | ALD <sup>1</sup> | 79                      | $1.6 \times 10^{-3}$              | 2.4                                  | 16.0                               |
| 2020 [8]         | Hf (1 wt%) - $\text{In}_2\text{O}_3$   | RF Sputtering    | 80                      | $3.6 \times 10^{-5}$              | 45                                   | 39.5                               |
| <b>This work</b> | Hf (0.5 M %) - $\text{In}_2\text{O}_3$ | Spin-coating     | 80                      | $4.0 \times 10^{-3}$              | 0.8                                  | 21.0                               |

<sup>1</sup> Atomic Layer Deposition.

### References

- Manivannan, M.; Rajendran, S. Investigation of inhibitive action of urea- $\text{Zn}^{2+}$  system in the corrosion control of carbon steel in sea water. *Int. J. Eng. Sci. Technol.* **2011**, *3*, 8038–8060.
- Ayeshamariam, A.; Bououdina, M.; Sanjeeviraja, C. Optical, electrical and sensing properties of  $\text{In}_2\text{O}_3$  nanoparticles. *Mater. Sci. Semicond. Process.* **2013**, *16*, 686–695, doi:10.1016/j.mssp.2012.12.009.
- Ahn, C.H.; Kim, J.H.; Cho, H.K. Tunable Electrical and Optical Properties in Composition Controlled Hf:ZnO Thin Films Grown by Atomic Layer Deposition. *J. Electrochem. Soc.* **2012**, *159*, H384–H387, doi:10.1149/2.026204JES/XML.
- Geng, Y.; Xie, Z.Y.; Yang, W.; Xu, S.S.; Sun, Q.Q.; Ding, S.J.; Lu, H.L.; Zhang, D.W. Structural, optical, and electrical properties of Hf-doped ZnO films deposited by atomic layer deposition. *Surf. Coatings Technol.* **2013**, *232*, 41–45, doi:10.1016/j.surfcoat.2013.04.050.
- Wang, F.; Zhao, X.; Duan, L.; Wang, Y.; Niu, H.; Ali, A. Structural, optical and electrical properties of Hf-doped ZnO transparent conducting films prepared by sol-gel method. *J. Alloys Compd.* **2015**, *623*, 290–297, doi:10.1016/j.jallcom.2014.10.117.
- Wang, G.H.; Shi, C.Y.; Zhao, L.; Diao, H.W.; Wang, W.J. Transparent conductive Hf-doped  $\text{In}_2\text{O}_3$  thin films by RF sputtering technique at low temperature annealing. *Appl. Surf. Sci.* **2017**, *399*, 716–720, doi:10.1016/j.apsusc.2016.11.239.
- Alfakes, B.; Villegas, J.; Apostoleris, H.; Devarapalli, R.; Tamalampudi, S.; Lu, J.-Y.; Viegas, J.; Almansouri, I.; Chiesa, M. Opto-electronic Tunability of Hf-Doped ZnO for Photovoltaic Applications. *J. Phys. Chem. C* **2019**, *123*, 15258–15266, doi:10.1021/ACS.jpcc.9b02253.
- Wang, G.H.; Shi, C.Y.; Zhao, L.; Mo, L.B.; Diao, H.W.; Wang, W.J. Efficiency improvement of the heterojunction solar cell using an antireflection Hf-doped  $\text{In}_2\text{O}_3$  thin film prepared via glancing angle magnetron sputtering technology. *Opt. Mater. (Amst)* **2020**, *109*, 110323, doi:10.1016/j.optmat.2020.110323.
